# Supplementary material
Source: HighWire-hosted journal article supplement (http://www.cmajopen.ca/highwire/filestream/81001/field_highwire_adjunct_files/0/open-2016-0027-1_at.pdf)
Supplement: open-2016-0027-1_at.pdf [file open-2016-0027-1_at.pdf]

APPENDIX 1 (as supplied by the authors): Description of variables

| Variable                                        | Description                                                                                    | Anticipated direction of claim duration (for both short-term and long-term disability claims unless otherwise stated) |
|-------------------------------------------------|------------------------------------------------------------------------------------------------|-----------------------------------------------------------------------------------------------------------------------|
| Age                                             | Claimant's age at the beginning of disability                                                  | Older age: (-)                                                                                                        |
| Gender                                          | Claimant's gender                                                                              | Female: (-)                                                                                                           |
| Salary                                          | Claimant's pre-disability gross income                                                         | Higher salary: (-)                                                                                                    |
| Job demands                                     | Physical demands of claimant's job (sedentary, light or heavy)                                 | Heavy: (-)<br>Light: (-)                                                                                              |
| Province                                        | Claimant's province of residence                                                               | Quebec: (-) for short-term disability, Quebec: (+) for long-term disability                                           |
| Comorbidity                                     | If claimant has a secondary illness recorded in their claim file                               | Comorbidity present: (-)                                                                                              |
| Office                                          | If a claim was received at Quebec or National office                                           | Quebec: (-) for short-term disability, Quebec: (+) for long-term disability                                           |
| Attendance at an independent medical evaluation | If claimant has attended an independent medical evaluation                                     | Attendance at an independent medical evaluation: (-)                                                                  |
| Receipt of rehabilitation                       | If claimant has received rehabilitation funded by SSQ Financial or not                         | Receipt of rehabilitation: (+)                                                                                        |
| Duration of claim approval                      | Duration from disability claim registration date to disability claim contractual approval date | Longer duration of claim approval: (-)                                                                                |

(-) associated with longer claim duration; (+) associated with shorter claim duration.
